# Supplementary figures and images for: Gestational diabetes and long-term risk for dyslipidemia: a population-based historical cohort study
Source: PubMed Central journal article supplement — BMJ Open Diabetes Res Care. 2020 Jan 21;8(1):e000870. doi: 10.1136/bmjdrc-2019-000870 (PMC7039589; doi:10.1136/bmjdrc-2019-000870), 2020-01-21

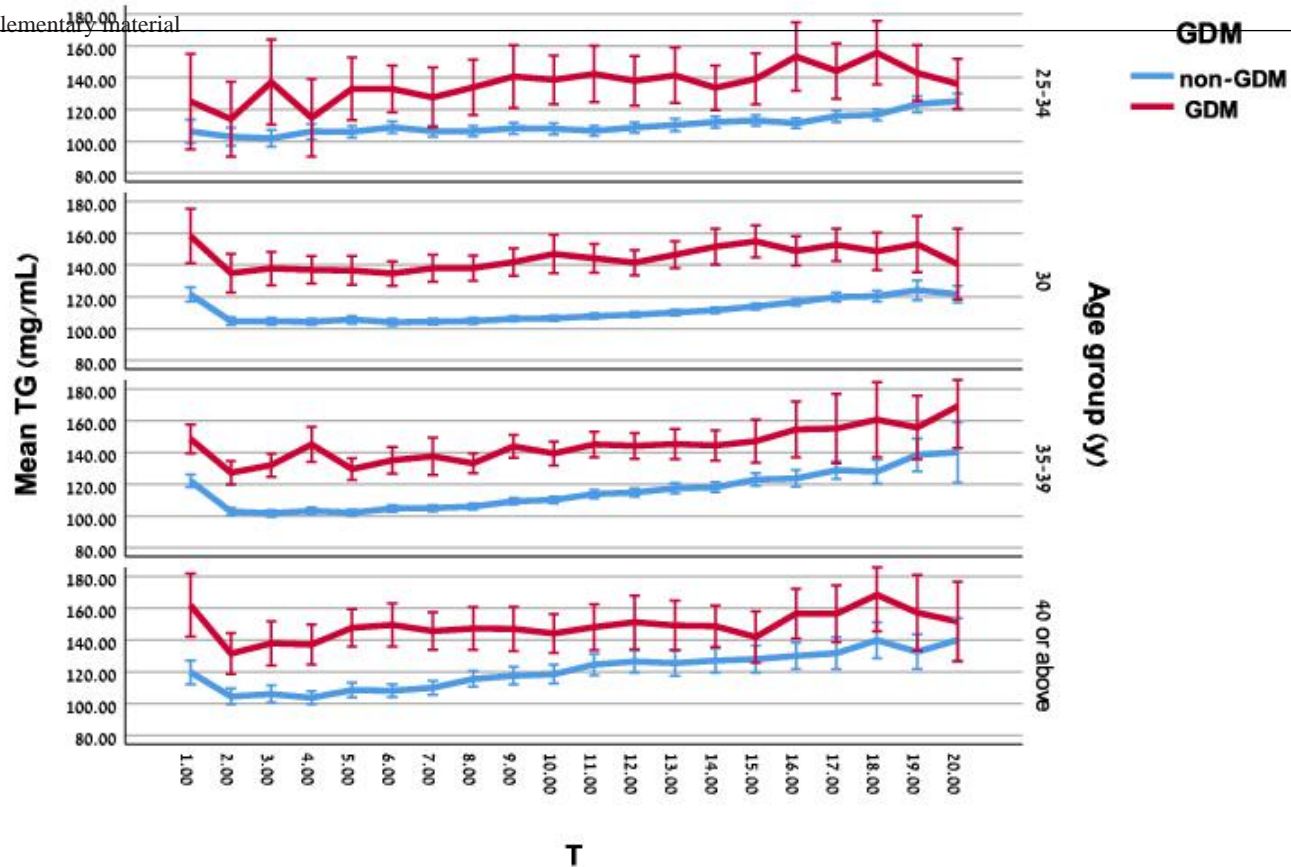

Supplement: bmjdrc-2019-000870supp001.pdf [file bmjdrc-2019-000870supp001.pdf]
